# Supplementary material
Source: HighWire-hosted journal article supplement (https://www.cmajopen.ca/highwire/filestream/80927/field_highwire_adjunct_files/3/open-2016-0008-original-submission.pdf)
Supplement: open-2016-0008-original-submission.pdf [file open-2016-0008-original-submission.pdf]

1  
2  
3 **Title Page**  
4

5  
6 **Restrictions for reimbursement of direct-acting antiviral treatment for hepatitis C virus**  
7  
8 **infection in Canada**  
9

10  
11  
12  
13  
14  
15 Marshall AD<sup>1</sup>, Saeed S<sup>2</sup>, Barrett L<sup>3</sup>, Cooper CL<sup>4</sup>, Treloar C<sup>5</sup>, Bruneau J<sup>6</sup>, Feld JJ<sup>7</sup>, Gallagher  
16  
17 L<sup>8</sup>, Klein MB<sup>2</sup>, Kraiden M<sup>9</sup>, Shoukry NH<sup>6</sup>, Taylor LE<sup>10</sup>, and Grebely J<sup>1</sup> on behalf of the  
18  
19 Canadian Network on Hepatitis C (CanHepC)  
20

21  
22  
23  
24 <sup>1</sup>The Kirby Institute, UNSW Australia, Sydney, Australia <sup>2</sup>Faculty of Medicine, M<sup>c</sup>Gill  
25  
26 University, Montreal, Canada <sup>3</sup>Faculty of Medicine, Dalhousie University, Halifax, Canada  
27  
28 <sup>4</sup>Department of Medicine, University of Ottawa, Ottawa, Canada <sup>5</sup>Centre for Social Research  
29  
30 in Health, UNSW Australia, Sydney, Australia <sup>6</sup>CRCHUM, Université de Montréal,  
31  
32 Montreal, Canada <sup>7</sup>University of Toronto, Toronto, Canada <sup>8</sup> Vancouver Coastal Health,  
33  
34 Vancouver, Canada <sup>9</sup>BC Centre for Disease Control, Vancouver, Canada <sup>10</sup>Department of  
35  
36 Medicine, Brown University, Providence, United States  
37  
38  
39  
40  
41  
42  
43  
44  
45

46 **Keywords:** Direct-acting antivirals, HCV, HCV therapy, policy, reimbursement coverage  
47  
48  
49  
50  
51

52 **Word count:** 2,453  
53  
54  
55  
56  
57  
58  
59  
60

1  
2  
3 **Corresponding Author:**  
4

5  
6 Alison Marshall  
7

8  
9  
10 Viral Hepatitis Clinical Research Program  
11

12  
13 The Kirby Institute  
14

15  
16 UNSW Australia  
17

18  
19 Phone: +61-2-9385 9960 Fax: +61-2-938 5 0876  
20

21  
22 Email: [amarshall@kirby.unsw.edu.au](mailto:amarshall@kirby.unsw.edu.au)  
23  
24  
25  
26  
27  
28  
29  
30  
31  
32  
33  
34  
35  
36  
37  
38  
39  
40  
41  
42  
43  
44  
45  
46  
47  
48  
49  
50  
51  
52  
53  
54  
55  
56  
57  
58  
59  
60

Confidential

## Abstract

**Background:** Interferon-free, direct-acting antiviral (DAA) HCV regimens are highly effective, achieving sustained virologic response (SVR) rates above 90%. However, because the list price for these therapies is prohibitive in Canada, universal drug coverage presents immense challenges. The aim of this study was to appraise HCV DAA reimbursement criteria in Canada for simeprevir, sofosbuvir, ledipasvir-sofosbuvir, and paritaprevir-ritonavir-ombitasvir plus dasabuvir. **Methods:** Reimbursement criteria for these HCV DAA therapies were collected for ten provinces and three territories in Canada from April 22, 2015 to January 5, 2016. The following information was extracted from health ministerial websites: 1) minimum fibrosis stage required; 2) drug and alcohol use restrictions; 3) HIV co-infection restrictions; and 4) prescriber type restrictions. Two investigators collected all data and then cross-checked responses. **Results:** Depending on the HCV DAA therapy, 82-92% of provinces/territories limit access to persons with moderate fibrosis ( $\geq$ F2 METAVIR or equivalent). There are no drug and alcohol use restrictions. However, several criteria are left to the discretion of the physician. Quebec does not reimburse simeprevir and sofosbuvir for HIV co-infected persons, with no restrictions found in the remaining jurisdictions. Up to half (50%) of provinces/territories restrict prescriber type to specialists only. **Interpretation:** This first review of HCV DAA reimbursement criteria in Canada showed substantial heterogeneity by jurisdiction, which could be minimized through the development and adoption of a national HCV strategy that follows evidence-based guidelines for HCV management. Additionally, accessing criteria was challenging, supporting the need for greater information transparency.

## Background

In Canada, an estimated 220,000 persons have chronic hepatitis C virus (HCV) infection [1]. By 2035, it is estimated that nearly one quarter of HCV-chronically infected Canadians will develop cirrhosis with associated healthcare costs rising from ~\$161 million to ~\$258 million [2]. Interferon-free, direct-acting antiviral (DAA) HCV regimens are highly effective, achieving sustained virologic response (SVR) rates above 90% even in patients with compensated cirrhosis [3-10]. SVR is associated with lowered risk of liver transplantation, liver-related mortality, all-cause mortality [11, 12], and improved quality-of-life outcomes [13, 14]. Shorter therapy duration and fewer adverse events have further reduced patient-level barriers to care [15-18]. Given these benefits, broadening access to HCV therapy is essential. However, the list price for HCV DAAs in Canada is ~\$60,000 for a 12 week course, presenting immense challenges for funding all persons with HCV.

A study of sofosbuvir reimbursement criteria in the United States (US) identified considerable variability across Medicaid committees [19]. Of 42 states with available data, most states (74%) requested evidence of advanced fibrosis (Meta-Analysis of Histologic Data in Viral Hepatitis [METAVIR] stage F3) or cirrhosis (F4). The majority of states (88%) had drug and alcohol use restrictions of which half (50%) required abstinence prior to commencing treatment. In nearly one-quarter (24%) of states, HIV co-infected populations had to be treated with antiretroviral therapy (ART) or demonstrate suppressed HIV viral loads. Further, one-third of states (33%) limited prescriber type to specialists. These restrictions do not align with published and accepted clinical guidelines from the American Association for the Study of Liver Diseases-Infectious Diseases Society of America (AASLD-IDSA), the Canadian Association for the Study of the Liver (CASL), and the European Association for the Study of the Liver (EASL) [20-22].

1  
2  
3  
4  
5  
6  
7 In contrast to the US, since 2010, the pan-Canadian Pharmaceutical Alliance (pCPA) – made  
8  
9 up of provincial/territorial health minister representatives – has negotiated drug prices with  
10  
11 manufacturers [23]. For this reason, it was hypothesized that Canada would have greater  
12  
13 reimbursement consistency by jurisdiction. Nonetheless, drug coverage criteria are ultimately  
14  
15 set by provinces/territories and thus, considerable inter-jurisdiction heterogeneity is still  
16  
17 possible.  
18  
19

20  
21  
22  
23  
24 The aim of this study was to appraise reimbursement criteria in Canada for the currently  
25  
26 approved HCV DAAs: simeprevir, sofosbuvir, ledipasvir-sofosbuvir, and paritaprevir-  
27  
28 ritonavir-ombitasvir plus dasabuvir. Criteria for Aboriginal persons and the incarcerated were  
29  
30 also reviewed as these populations are disproportionately affected by HCV and receive drug  
31  
32 coverage through federal plans [24-27].  
33  
34  
35  
36  
37  
38  
39  
40  
41  
42  
43  
44  
45  
46  
47  
48  
49  
50  
51  
52  
53  
54  
55  
56  
57  
58  
59  
60

## Methods

### Data Collection

Reimbursement criteria for simeprevir (with peginterferon plus ribavirin), sofosbuvir (with peginterferon and/or ribavirin), ledipasvir-sofosbuvir, and paritaprevir-ritonavir-ombitasvir plus dasabuvir (with or without ribavirin) were collected for all ten provinces and three territories in Canada as well as from the Non-Insured Health Benefits (NIHB) Program and the Correctional Service Canada (CSC) National Formulary during April 22, 2015 to January 5, 2016. The health ministry in each province/territory sets its own reimbursement criteria and hence, information was primarily collected from ministerial websites (Table 1).

Data were extracted from online, publically available reimbursement information including special authorization request forms, drug formularies, amendments to formularies, and drug benefit lists. If information was not available online, the study authors contacted the ministry directly. Healthcare practitioners (co-authors) were also contacted to facilitate access to documentation from ministries or pharmaceutical industry. When information could not be retrieved or was not available (e.g. the HCV therapy was not reimbursed), the data were labelled as 'n.a.' (i.e. not available). If a restriction (e.g. drug and alcohol use) was not listed with the criteria, these data were labelled as 'None listed'. The latter categorization does not necessarily indicate that no restriction exists; just that a written instruction could not be identified.

Criteria set by federal public drug plans were also reviewed. The NIHB program reimburses medications and medical services not covered under provincial/territorial or private plans for

1  
2  
3 First Nations people and Inuit. Prisoners in federal penitentiaries (sentences  $\geq 2$  years) have a  
4 similar federal plan and these criteria were reviewed. Prisoners with sentences  $< 2$  years  
5  
6 follow criteria set by provincial corrections, which are the same criteria as the  
7  
8 province/territory where the sentence is being served.  
9  
10

11  
12  
13  
14  
15  
16 Data were collected by two authors (ADM and SS) and were cross-checked by each other  
17  
18 with inconsistencies resolved through consensus. Data were organized using an Excel  
19  
20 spreadsheet (Microsoft<sup>®</sup> Corporation, Redmond, WA, USA).  
21  
22

23  
24  
25  
26  
27 Data were organized into categories so that criteria could be compared across  
28  
29 provinces/territories. To compare with Medicaid reimbursement criteria in the US [19], the  
30  
31 same primary outcomes were collected: 1) minimum fibrosis stage required; 2) drug and  
32  
33 alcohol use restrictions; 3) HIV co-infection restrictions; and 4) prescriber type restrictions.  
34  
35 Fibrosis data were categorized as the minimum fibrosis stage required (categories: no  
36  
37 restrictions;  $\geq F2$ ;  $\geq F3$ ; or F4, METAVIR or equivalent). Depending on the jurisdiction,  
38  
39 fibrosis stage is assessed by transient elastography (kPa) (e.g. FibroScan<sup>®</sup>), aspartate  
40  
41 aminotransferase-to-platelet ratio index (APRI) score, Fibrosis-4 (FIB-4) index score, and  
42  
43 liver biopsy. Drug and alcohol use criteria were categorized based on current or past drug or  
44  
45 alcohol use restrictions (categories: yes; no). HIV co-infection data were categorized as to  
46  
47 whether HIV co-infected persons were eligible for treatment [categories: eligible (HIV-co-  
48  
49 infected persons had the same criteria as HCV monoinfected) or ineligible (HIV-coinfection  
50  
51 was listed in exclusion criteria)]. Prescriber data were categorized as whether a hepatologist,  
52  
53 gastroenterologist or infectious disease specialist prescriber was required or if non-specialist  
54  
55  
56  
57  
58  
59  
60

1  
2  
3 options were permitted (categories: specialist; general practitioner). In some cases, a  
4  
5 physician with experience treating HCV could prescribe treatment once meeting designated  
6  
7 prescriber status as defined by the jurisdiction: this was categorised as 'general practitioner'.  
8  
9  
10 Treatment eligibility for decompensated cirrhosis was also noted (categories: eligible;  
11  
12 ineligible; or may be considered). Decompensated cirrhosis was defined as Child-Pugh score  
13  
14 >6 (class B or C) similar to the US reimbursement study [19].  
15  
16  
17  
18  
19  
20

21 Descriptive statistics were used to demonstrate the proportion of provinces/territories that  
22  
23 restrict drug coverage by primary outcome. Data were presented in percentages. Map imagery  
24  
25 was created with Tableau Software 9.0 (Seattle, WA, USA).  
26  
27  
28  
29  
30  
31  
32  
33  
34  
35  
36  
37  
38  
39  
40  
41  
42  
43  
44  
45  
46  
47  
48  
49  
50  
51  
52  
53  
54  
55  
56  
57  
58  
59  
60



## Results

### *Simeprevir with peginterferon plus ribavirin*

Simeprevir is approved for use in genotype 1 infection in combination with peginterferon plus ribavirin. Patients with genotype 1a infection require resistance testing demonstrating the absence of the NS3 Q80K polymorphism. Prince Edward Island does not reimburse simeprevir.

As shown in Table 2, 92% (n=11) of jurisdictions require a fibrosis stage of  $\geq$ F2. Quebec does not provide this information (Figure 1A). None of the jurisdictions lists drug and alcohol use criteria. Three-quarters of provinces/territories (n=9) provide no information for HIV-HCV co-infection. In two jurisdictions (17%), Manitoba and Ontario, persons with HIV-HCV co-infection are eligible for treatment using the same criteria for HCV mono-infection. HIV co-infected persons are not eligible for treatment in Quebec. However, study authors specified that exceptions could be granted via the 'patient d'exception' route whereby a prescriber provides additional justification for treatment. Fifty percent of provinces/territories (n=6) require specialist prescription and four (33%) provide no information. Two jurisdictions (17%), British Columbia and Ontario, allow general practitioners to prescribe. More than half (n=7 [58%]) of jurisdictions do not allow treatment for patients with decompensated cirrhosis. There is no information available for the remaining provinces/territories (n=5 [42%]).

1  
2  
3 *Sofosbuvir with peginterferon and/or ribavirin*  
4

5  
6 Sofosbuvir is approved for use in genotypes 1-3 infections in combination with pegylated  
7  
8 interferon and/or ribavirin. In Quebec, reimbursement for genotype 4 infection is also  
9  
10 permitted. Prince Edward Island does not reimburse sofosbuvir.  
11

12  
13  
14  
15  
16  
17 As illustrated in Table 3, the majority of provinces/territories (n=11 [92%]) require  $\geq$ F2.  
18  
19 Quebec does not list this information (Figure 1B). In practice, there are no fibrosis stage  
20  
21 restrictions (Klein MB and Bruneau J, Personal Communication, October 2015). None of the  
22  
23 jurisdictions has drug and alcohol use restrictions. There are no stated restrictions for HIV co-  
24  
25 infected persons in nine jurisdictions (75%). Two jurisdictions (17%) do not provide  
26  
27 information. HIV co-infected persons were not eligible for treatment in Quebec. Similar to  
28  
29 simeprevir, exceptions could be granted through the 'patient d'exception' route. Eight  
30  
31 jurisdictions (67%) permit general practitioners to prescribe whereas three jurisdictions  
32  
33 (25%) require specialist prescribers. Quebec does not list this information. Treatment of  
34  
35 decompensated cirrhosis is considered on a 'case by case basis' in most jurisdictions (n=8  
36  
37 [67%]) with four provinces/territories (33%) lacking information.  
38  
39  
40  
41  
42  
43  
44

45 *Ledipasvir-Sofosbuvir*  
46

47  
48 Ledipasvir-sofosbuvir is approved for use in genotype 1 infection. Prince Edward Island does  
49  
50 not reimburse ledipasvir-sofosbuvir.  
51  
52  
53  
54  
55  
56  
57  
58  
59  
60

1  
2  
3 As shown in Table 4, 92% of provinces/territories (n=11) require a fibrosis stage of  $\geq$ F2. In  
4  
5 Quebec, fibrosis stage requirements depend on the number of years the DAA therapy has  
6  
7 been on market. In year 1 (July 2015-2016), evidence of advanced fibrosis ( $\geq$ F3) or cirrhosis  
8  
9 is required (Figure 1C). In years 2-3, persons with moderate fibrosis (F2) or mild fibrosis  
10  
11 (F1) plus an indicator of poor prognosis, such as co-infection with HIV or HBV, will be  
12  
13 required. For years 4-6, all patients will be eligible for treatment regardless of fibrosis stage.  
14  
15 There are no drug and alcohol use restrictions although British Columbia criteria state that  
16  
17 ‘patients who are at high risk for non-compliance’ are not eligible, Saskatchewan has a  
18  
19 Directly Observed Therapy (DOT) option, and the NIHB program requests that patients have  
20  
21 access to multidisciplinary health teams. In all 12 jurisdictions, persons with HIV-HCV co-  
22  
23 infection are eligible for treatment with HCV mono-infection criteria. Nine  
24  
25 provinces/territories (75%) allow general practitioners to prescribe while three jurisdictions  
26  
27 (25%) require specialist prescribers. Eight jurisdictions (67%) have decompensated cirrhosis  
28  
29 restrictions. Restrictions are not listed; only that patients ‘may be considered’ for treatment.  
30  
31 Three jurisdictions (25%) do not provide information. Patients with decompensated cirrhosis  
32  
33 are eligible for treatment in Quebec.  
34  
35  
36  
37  
38  
39  
40  
41  
42

43 *Paritaprevir-ritonavir-ombitasvir plus dasabuvir (with or without ribavirin)*

44  
45 Paritaprevir-ritonavir-ombitasvir plus dasabuvir (with or without ribavirin) is approved for  
46  
47 use in genotypes 1a or 1b subtype infections. Prince Edward Island also permits treatment of  
48  
49 genotype 4 infection. As of January 2016, paritaprevir-ritonavir-ombitasvir plus dasabuvir  
50  
51 was approved in 11 jurisdictions.  
52  
53  
54  
55  
56  
57  
58  
59  
60

1  
2  
3 As illustrated in Table 5, the majority of provinces/territories [n=9 (82%)] require a fibrosis  
4 stage of  $\geq$ F2. A fibrosis stage of  $\geq$ F3 is required for Quebec in year 1, with increased  
5 eligibility in subsequent years (Figure 1D). Prince Edward Island has no fibrosis stage  
6 requirements. There are no drug and alcohol use restrictions. However, Prince Edward Island  
7 lists ‘methadone or equivalent for at least 6 months’ and ‘stable address’ in the inclusion  
8 criteria as well as active injecting drug use in the exclusion criteria, at the discretion of the  
9 physician. All 11 jurisdictions allow HIV-HCV co-infected persons to receive therapy with  
10 HCV mono-infection criteria. Prince Edward Island requires HIV co-infected persons to be  
11 treated off-island by a specialist. Three jurisdictions (27%) require a specialist prescription  
12 while eight provinces (73%) permit prescriptions by general practitioner. In most  
13 provinces/territories (n=9 [82%]), patients with decompensated cirrhosis are ineligible for  
14 treatment. There is no information for British Columbia and Prince Edward Island.  
15  
16  
17  
18  
19  
20  
21  
22  
23  
24  
25  
26  
27  
28  
29  
30  
31  
32

### 33 *First Nations People and Inuit and Federal Prisoners*

34  
35  
36 For simeprevir, sofosbuvir, ledipasvir-sofosbuvir, NIHB and CSC criteria require a fibrosis  
37 stage of  $\geq$ F2 (Tables 2-5). Paritaprevir-ritonavir-ombitasvir plus dasabuvir is reimbursed for  
38 federal prisoners and requires a fibrosis stage of  $\geq$ F2. The NIHB program approved  
39 paritaprevir-ritonavir-ombitasvir plus dasabuvir; online access was not available at time of  
40 writing. CSC criteria state that for all four regimens, treatment is prioritized for patients with  
41 F3-F4 and DOT is required. NIHB criteria request a specialist prescription for simeprevir.  
42  
43 Further, NIHB and CSC criteria permit HIV co-infected populations to be treated with  
44 ledipasvir-sofosbuvir.  
45  
46  
47  
48  
49  
50  
51  
52  
53  
54  
55  
56  
57  
58  
59  
60

## Interpretation

Findings indicate variability in HCV DAA reimbursement criteria by jurisdiction in Canada. Depending on the therapy, 82-92% of provinces/territories limit reimbursement to fibrosis stages of  $\geq$ F2. No alcohol or drug use restrictions were found. Only Quebec lists HIV co-infection restrictions. Lastly, 25-50% of jurisdictions restrict prescriber type to specialists.

In contrast to Canada, 74% of US states limit reimbursement to evidence of advanced fibrosis or cirrhosis (F3-F4) [19]. Clinical guidelines state that *all* patients with chronic HCV, irrespective of disease stage, should receive treatment [20-22], including prioritizing treatment for populations at risk of transmitting HCV, e.g. people who inject drugs (PWID) [22]. Further, a review by the Canadian Agency for Drugs and Technologies in Health (CADTH) demonstrated that treating patients across all fibrosis stages is cost-effective [28]. Given this, fibrosis stage restrictions should be re-reviewed.

While there are no drug and alcohol use restrictions for HCV DAA therapy in Canada, 50% of US states require drug and/or alcohol abstinence prior to treatment commencement [19]. Considering that treatment of PWID is safe and effective [29], cost-effective [30, 31], and would prevent HCV transmission [32], absence of such restrictions is warranted. HIV co-infection restrictions are mostly non-existent in Canada whereas 25% of US states request evidence of ART therapy or suppressed HIV RNA levels [19]. Canada's broader access is more aligned with clinical guidelines [20-22]. Up to half of jurisdictions in Canada restrict prescriber type to specialists only. Specialists may be better suited for the management of DAA-based therapy in select circumstances (potential drug-drug interactions with complex HIV regimens or decompensated cirrhosis), new interferon-free DAA therapies are simple,

1  
2  
3 tolerable, and highly effective and general practitioners should not be excluded from  
4  
5 prescribing HCV therapy. Programs to provide appropriate education, training, and linkage to  
6  
7 HCV specialists could facilitate broadened prescribing by general practitioners.  
8  
9

10  
11  
12  
13  
14 There were several study limitations. Retrieving complete online criteria was challenging.  
15  
16 Though ministries provided criteria when contacted, greater information transparency is  
17  
18 needed. In addition, online criteria might not be up-to-date. NIHB criteria updates lag  
19  
20 considerably behind other jurisdictions, possibly impeding treatment access. This study  
21  
22 cannot speak to implementation of criteria. Further research might highlight greater inter-  
23  
24 jurisdiction heterogeneity. For example, fibrosis cut-off values and methodologies differed by  
25  
26 jurisdiction, which may contribute to inequitable therapy access. Lastly, study authors were  
27  
28 unable to retrieve online private health insurance criteria for comparison. Medicaid recipients  
29  
30 in the US are ten times more likely to be denied reimbursement for HCV therapy than those  
31  
32 with private insurance [33]. Similar research in the Canadian context would be beneficial.  
33  
34  
35  
36  
37  
38  
39

#### 40 **Conclusion**

41  
42 This first review of HCV DAA reimbursement criteria in Canada showed greater  
43  
44 reimbursement homogeneity than the US [19]. The purchasing power of the pCPA might  
45  
46 partly explain this result as the US lacks an equivalent committee and Medicaid cannot  
47  
48 legally negotiate with manufacturers. The pCPA process may however inadvertently benefit  
49  
50 jurisdictions with larger HCV affected populations (i.e. purchase more drugs). Prince Edward  
51  
52 Island negotiated with a drug manufacturer directly and as a result, does not offer sofosbuvir  
53  
54  
55  
56  
57  
58  
59  
60

1  
2  
3 and ledipasvir-sofosbuvir [34]. The impact of the pCPA will become clearer once additional  
4 negotiations have occurred [35].  
5  
6  
7  
8  
9

10  
11 This review has considerable implications for policy. The development and adoption of a  
12 national HCV strategy akin to Australia [36] or action plans in Scotland [37, 38] could  
13 minimize criteria heterogeneity and facilitate greater information transparency. Increased  
14 uptake of HCV DAA therapy, especially by PWID, is essential to reduce HCV incidence and  
15 contribute to viral elimination in Canada, and fibrosis stage restrictions are neither evidence-  
16 based nor cost-effective. By comparison, HCV treatment in Australia will be reimbursed with  
17 no restrictions based on liver disease stage, recent drug use, HIV co-infection, or specialist  
18 prescribing, across all jurisdictions [39, 40]. In Canada, reimbursement criteria should more  
19 closely align with evidence to reduce therapy costs and better optimise treatment uptake in  
20 this groundbreaking era in HCV therapy.  
21  
22  
23  
24  
25  
26  
27  
28  
29  
30  
31  
32  
33  
34  
35  
36  
37  
38  
39  
40  
41  
42  
43  
44  
45  
46  
47  
48  
49  
50  
51  
52  
53  
54  
55  
56  
57  
58  
59  
60

1  
2  
3 **Acknowledgements:** The authors would like to thank Evan Cunningham (<sup>1</sup>The Kirby  
4  
5 Institute, UNSW Australia, Sydney, Australia) for his assistance with the map figures.  
6  
7

8  
9  
10 **Disclaimer:** JJF has received consulting fees with consulting with Abbvie, Abbott, BMS,  
11  
12 Gilead, Merck and Janssen. MBK reports receipt of grants from the Canadian Institute of  
13  
14 Health Research (CIHR), Fonds de recherche Santé-Québec (FRQ-S) and CIHR Canadian  
15  
16 HIV Trials Network (CTN); research support from Merck, Bristol-Myers Squibb,  
17  
18 Gilead and Viiv Healthcare; consulting fees from ViiV, Abbvie, BMS and Gilead; and  
19  
20 honoraria for lectures from, Abbvie and Merck.  
21  
22  
23  
24  
25  
26

27 **Funding:** The Canadian Network on Hepatitis C (CanHepC) is supported by NHC-142832.  
28  
29 The study content does not necessarily represent the Canadian Institutes of Health Research  
30  
31 and the Public Health Agency of Canada. The Kirby Institute is funded by the Australian  
32  
33 Government Department of Health and Ageing. The views expressed in this publication do  
34  
35 not necessarily represent the position of the Australian Government. ADM holds a University  
36  
37 International Postgraduate Award (UIPA), UNSW Australia, and is partly supported by the  
38  
39 CanHepC Trainee Program, Canada. CLC is an OHTN Applied HIV Research Chair.  
40  
41 MBK is supported by a “Chercheurs nationaux” career award from the Fonds de recherche  
42  
43 Santé-Québec (FRQ-S). LT is supported in part by Grant # P30AI042853 from the National  
44  
45 Institute of Allergy and Infectious Diseases (NIAID). The content is solely the responsibility  
46  
47 of the authors and does not necessarily represent the official views of the NIAID or the  
48  
49 National Institute of Health. JG is supported by a National Health and Medical Research  
50  
51 Council Career Development Fellowship.  
52  
53  
54  
55  
56  
57  
58  
59  
60



## References

1. Trubnikov, M., P. Yan, and C. Archibald, *Estimated prevalence of hepatitis C virus infection in Canada, 2011*. Canada Communicable Disease Report. 2014. Available from: <http://www.phac-aspc.gc.ca/publicat/ccdr-rmtc/14vol40/dr-rm40-19/surveillance-b-eng.php> (accessed 2015 June 4).
2. Myers, R.P., et al., *Burden of disease and cost of chronic hepatitis C infection in Canada*. Can J Gastroenterol Hepatol, 2014. **28**(5): p. 243-50.
3. Afdhal, N., et al., *Ledipasvir and sofosbuvir for previously treated HCV genotype 1 infection*. N Engl J Med, 2014. **370**(16): p. 1483-93.
4. Afdhal, N., et al., *Ledipasvir and sofosbuvir for untreated HCV genotype 1 infection*. N Engl J Med, 2014. **370**(20): p. 1889-98.
5. Feld, J.J., et al., *Treatment of HCV with ABT-450/r-ombitasvir and dasabuvir with ribavirin*. N Engl J Med, 2014. **370**(17): p. 1594-603.
6. Lawitz, E., et al., *Sofosbuvir for previously untreated chronic hepatitis C infection*. N Engl J Med, 2013. **368**(20): p. 1878-87.
7. Lawitz, E., et al., *Sofosbuvir with peginterferon-ribavirin for 12 weeks in previously treated patients with hepatitis C genotype 2 or 3 and cirrhosis*. Hepatology, 2015. **61**(3): p. 769-75.
8. Poordad, F., et al., *ABT-450/r-ombitasvir and dasabuvir with ribavirin for hepatitis C with cirrhosis*. N Engl J Med, 2014. **370**(21): p. 1973-82.
9. Reddy, K.R., et al., *Ledipasvir and sofosbuvir in patients with genotype 1 hepatitis C virus infection and compensated cirrhosis: An integrated safety and efficacy analysis*. Hepatology, 2015.
10. Zeuzem, S., et al., *Retreatment of HCV with ABT-450/r-ombitasvir and dasabuvir with ribavirin*. N Engl J Med, 2014. **370**(17): p. 1604-14.
11. van der Meer, A.J., et al., *Association between sustained virological response and all-cause mortality among patients with chronic hepatitis C and advanced hepatic fibrosis*. JAMA, 2012. **308**(24): p. 2584-93.
12. Backus, L.I., et al., *A sustained virologic response reduces risk of all-cause mortality in patients with hepatitis C*. Clin Gastroenterol Hepatol, 2011. **9**(6): p. 509-516 e1.
13. Younossi, Z.M., et al., *Treatment with ledipasvir and sofosbuvir improves patient-reported outcomes: Results from the ION-1, -2, and -3 clinical trials*. Hepatology, 2015. **61**(6): p. 1798-808.
14. John-Baptiste, A.A., et al., *Sustained responders have better quality of life and productivity compared with treatment failures long after antiviral therapy for hepatitis C*. Am J Gastroenterol, 2009. **104**(10): p. 2439-48.
15. Treloar, C., et al., *Barriers and facilitators for assessment and treatment of hepatitis C virus infection in the opioid substitution treatment setting: insights from the ETHOS study*. J Viral Hepat, 2014. **21**(8): p. 560-7.
16. Swan, D., et al., *Barriers to and facilitators of hepatitis C testing, management, and treatment among current and former injecting drug users: a qualitative exploration*. AIDS Patient Care STDS, 2010. **24**(12): p. 753-62.
17. Grebely, J., et al., *Barriers associated with the treatment of hepatitis C virus infection among illicit drug users*. Drug Alcohol Depend, 2008. **93**(1-2): p. 141-7.
18. Doab, A., C. Treloar, and G.J. Dore, *Knowledge and attitudes about treatment for hepatitis C virus infection and barriers to treatment among current injection drug users in Australia*. Clin Infect Dis, 2005. **40 Suppl 5**: p. S313-20.
19. Barua, S., et al., *Restrictions for Medicaid Reimbursement of Sofosbuvir for the Treatment of Hepatitis C Virus Infection in the United States*. Ann Intern Med, 2015. **163**(3): p. 215-23.

- 1
  - 2
  - 3
  - 4
  - 5
  - 6
  - 7
  - 8
  - 9
  - 10
  - 11
  - 12
  - 13
  - 14
  - 15
  - 16
  - 17
  - 18
  - 19
  - 20
  - 21
  - 22
  - 23
  - 24
  - 25
  - 26
  - 27
  - 28
  - 29
  - 30
  - 31
  - 32
  - 33
  - 34
  - 35
  - 36
  - 37
  - 38
  - 39
  - 40
  - 41
  - 42
  - 43
  - 44
  - 45
  - 46
  - 47
  - 48
  - 49
  - 50
  - 51
  - 52
  - 53
  - 54
  - 55
  - 56
  - 57
  - 58
  - 59
  - 60
20. *Hepatitis C guidance: AASLD-IDSAs recommendations for testing, managing, and treating adults infected with hepatitis C virus*. American Association for the Study of Liver Diseases; Infectious Diseases Society of America. Guidance Panel. *Hepatology*, 2015. **62**(3): p. 932-54.
21. Myers, R.P., et al., *An update on the management of chronic hepatitis C: 2015 Consensus guidelines from the Canadian Association for the Study of the Liver*. *Can J Gastroenterol Hepatol*, 2015. **29**(1): p. 19-34.
22. *EASL Recommendations on Treatment of Hepatitis C 2015*. European Association for the Study of the Liver. *EASL J Hepatol*, 2015. **63**(1): p. 199-236.
23. *The pan-Canadian Pharmaceutical Alliance*. Council of the Federation Secretariat. 2013. Available from: <http://www.pmprovincesterritoires.ca/en/initiatives/358-pan-canadian-pharmaceutical-alliance> (accessed 2015 December 12).
24. Remis, R., *Modelling the Incidence and Prevalence of Hepatitis C Infection and Sequelae in Canada, 2007. Final Report*. Community Acquired Infections Division Centre for Communicable Disease and Emergency Preparedness Branch Public Health Agency of Canada 2009; Catalogue Number HP40-39/2009E-PDF. ISBN 978-1-100-12614-2. Available from: <http://www.phac-aspc.gc.ca/sti-its-surv-epi/model/pdf/model07-eng.pdf> (accessed 2015 June 3).
25. Uhanova, J., et al., *The epidemiology of hepatitis C in a Canadian Indigenous population*. *Can J Gastroenterol*, 2013. **27**(6): p. 336-40.
26. *Infectious Disease Surveillance in Canadian Federal Penitentiaries 2005-2006. [Archived]. Part II: Results. Chapter 3: Hepatitis C Virus (HCV). HCV Prevalence. Year-end point prevalence* Correctional Service Canada. Available from: <http://www.csc-scc.gc.ca/publications/infdscfp-2005-06/p7-eng.shtml> (accessed 2015 June 4).
27. Hajarizadeh, B., J. Grebely, and G.J. Dore, *Epidemiology and natural history of HCV infection*. *Nat Rev Gastroenterol Hepatol*, 2013. **10**(9): p. 553-62.
28. *Drugs for Chronic Hepatitis C Infection: Recommendations Report*. CADTH Therapeutic Review. November 2015. Available from: [https://www.cadth.ca/sites/default/files/pdf/TR0008\\_HepatitisC\\_RecsReport\\_e.pdf](https://www.cadth.ca/sites/default/files/pdf/TR0008_HepatitisC_RecsReport_e.pdf) (accessed 15 December 2015).
29. Aspinall, E.J., et al., *Treatment of hepatitis C virus infection among people who are actively injecting drugs: a systematic review and meta-analysis*. *Clin Infect Dis*, 2013. **57 Suppl 2**: p. S80-9.
30. Martin, N.K., et al., *Cost-effectiveness of hepatitis C virus antiviral treatment for injection drug user populations*. *Hepatology*, 2012. **55**(1): p. 49-57.
31. Hellard, M., et al., *Cost-effectiveness of treating chronic hepatitis C virus with direct-acting antivirals in people who inject drugs in Australia*. *J Gastroenterol Hepatol*, 2015.
32. Martin, N.K., et al., *Hepatitis C virus treatment for prevention among people who inject drugs: Modeling treatment scale-up in the age of direct-acting antivirals*. *Hepatology*, 2013. **58**(5): p. 1598-609.
33. Lo Re, V.e.a., *Incidence and determinants of denial of DAA therapy by type of insurance during the first six months of the modern HCV treatment era*. AASLD Liver Meeting., 2015. **San Francisco, abstract LB-5, 2015**.
34. *Prince Edward Island to introduce new lifesaving hepatitis C strategy*. Press release. February 12 2015. Department of Health and Wellness. Prince Edward Island. Available from: <http://www.gov.pe.ca/health/index.php3?number=news&dept=&newsnumber=10059&lang=E> (accessed 2015 December 11).
35. Milliken, D., et al., *Comparison of drug coverage in Canada before and after the establishment of the pan-Canadian Pharmaceutical Alliance*. *BMJ Open*, 2015. **5**(9): p. e008100.
36. *Fourth National Hepatitis C Strategy. 2014-2017*. Australian Government. Department of Health. Published 2014. Available from:

- 1  
2  
3  
4  
5  
6  
7  
8  
9  
10  
11  
12  
13  
14  
15  
16  
17  
18  
19  
20  
21  
22  
23  
24  
25  
26  
27  
28  
29  
30  
31  
32  
33  
34  
35  
36  
37  
38  
39  
40  
41  
42  
43  
44  
45  
46  
47  
48  
49  
50  
51  
52  
53  
54  
55  
56  
57  
58  
59  
60
- <http://www.health.gov.au/internet/main/publishing.nsf/Content/ohp-bbvs-hepc> (accessed 11 December 2015).
37. *Hepatitis C. Action Plan for Scotland. Phase I: September 2006 - August 2008*. Scottish Executive. Report. September 2006. Available from: <http://www.gov.scot/Resource/Doc/148746/0039553.pdf> (accessed 2015 December 11).
38. *Hepatitis C Action Plan for Scotland. Phase II: May 2008 - March 2011*. The Scottish Government. Report. May 2008. Available from: <http://www.gov.scot/resource/doc/222750/0059978.pdf> (accessed 2015 December 11).
39. *July 2015. Positive Recommendations*. The Pharmaceutical Benefits Scheme. Australian Government. Department of Health. Available from: <http://www.pbs.gov.au/industry/listing/elements/pbac-meetings/pbac-outcomes/2015-07/web-outcomes-july-2015-positive-recommendations.pdf> (accessed 2016 January 05).
40. Gartrell, A., *Turnbull government to spend \$1 billion on hepatitis C 'miracle cures' for all*. The Sydney Morning Herald. 20 December 2015. Available from: <http://www.smh.com.au/federal-politics/political-news/turnbull-government-to-spend-1-billion-on-hepatitis-c-miracle-cures-for-all-20151219-glrib0.html> (accessed 21 December 2015).

Confidential

1  
2  
3  
4  
5  
6  
7  
8  
9  
10  
11  
12  
13  
14  
15  
16  
17  
18  
19  
20  
21  
22  
23  
24  
25  
26  
27  
28  
29  
30  
31  
32  
33  
34  
35  
36  
37  
38  
39  
40  
41  
42  
43  
44  
45  
46  
47  
48  
49

**Table 1.** Health ministries by province/territory in Canada

| Province/Territory      | Health Ministry                                                     |                                                                                                                            |
|-------------------------|---------------------------------------------------------------------|----------------------------------------------------------------------------------------------------------------------------|
| British Columbia        | British Columbia Ministry of Health                                 | <a href="http://www.gov.bc.ca/health">www.gov.bc.ca/health</a>                                                             |
| Alberta                 | Alberta Health and Wellness                                         | <a href="http://www.health.alberta.ca">www.health.alberta.ca</a>                                                           |
| Saskatchewan            | Saskatchewan Health                                                 | <a href="http://www.health.gov.sk.ca">www.health.gov.sk.ca</a>                                                             |
| Manitoba                | Manitoba Health                                                     | <a href="http://www.gov.mb.ca/health">www.gov.mb.ca/health</a>                                                             |
| Ontario                 | Ontario Ministry of Health and Long-Term Care                       | <a href="http://www.health.gov.on.ca">www.health.gov.on.ca</a>                                                             |
| Quebec                  | Quebec Ministry of Health and Social Services                       | <a href="http://www.msss.gouv.qc.ca">www.msss.gouv.qc.ca</a>                                                               |
| New Brunswick           | New Brunswick Department of Health                                  | <a href="http://www2.gnb.ca/content/gnb/en/departments/health.html">www2.gnb.ca/content/gnb/en/departments/health.html</a> |
| Newfoundland & Labrador | Newfoundland & Labrador Department of Health and Community Services | <a href="http://www.health.gov.nl.ca/health">www.health.gov.nl.ca/health</a>                                               |
| Prince Edward Island    | Prince Edward Island Department of Health and Wellness              | <a href="http://www.gov.pe.ca/health">www.gov.pe.ca/health</a>                                                             |
| Nova Scotia             | Nova Scotia Department of Health and Wellness                       | <a href="http://novascotia.ca/DHW">novascotia.ca/DHW</a>                                                                   |
| Yukon                   | Yukon Health and Social Services                                    | <a href="http://www.hss.gov.yk.ca">www.hss.gov.yk.ca</a>                                                                   |
| Northwest Territories   | Northwest Territories Health and Social Services                    | <a href="http://www.hss.gov.nt.ca">www.hss.gov.nt.ca</a>                                                                   |
| Nunavut                 | Nunavut Department of Health                                        | <a href="http://www.gov.nu.ca/health">www.gov.nu.ca/health</a>                                                             |

**Table 2.** Key eligibility criteria for simeprevir with peginterferon plus ribavirin reimbursement by province/territory in Canada

| Province/Territory      | Restrictions                |                            |                               |                          |                                      |
|-------------------------|-----------------------------|----------------------------|-------------------------------|--------------------------|--------------------------------------|
|                         | Fibrosis stage <sup>¶</sup> | Substance use <sup>†</sup> | HIV co-infection <sup>‡</sup> | Prescriber <sup>§</sup>  | Decompensated cirrhosis <sup>‡</sup> |
| British Columbia        | ≥ F2                        | None listed                | None listed                   | General Practitioner     | None listed                          |
| Alberta                 | ≥ F2                        | None listed                | None listed                   | None listed              | Ineligible                           |
| Saskatchewan            | ≥ F2                        | None listed                | None listed                   | Specialist               | None listed                          |
| Manitoba                | ≥ F2                        | None listed                | Eligible                      | Specialist               | Ineligible                           |
| Ontario                 | ≥ F2                        | None listed                | Eligible                      | General Practitioner     | Ineligible                           |
| Quebec                  | None listed                 | None listed                | Ineligible <sup>¶¶</sup>      | None listed              | None listed                          |
| New Brunswick           | ≥ F2                        | None listed                | None listed                   | None listed              | Ineligible                           |
| Newfoundland & Labrador | ≥ F2                        | None listed                | None listed                   | None listed              | Ineligible                           |
| Prince Edward Island    | n.a.                        | n.a.                       | n.a.                          | n.a.                     | n.a.                                 |
| Nova Scotia             | ≥ F2                        | None listed                | None listed                   | Specialist <sup>§§</sup> | Ineligible                           |
| Yukon                   | ≥ F2                        | None listed                | None listed                   | Specialist               | Ineligible                           |
| Northwest Territories   | ≥ F2                        | None listed                | None listed                   | Specialist <sup>§§</sup> | None listed                          |
| Nunavut                 | ≥ F2                        | None listed                | None listed                   | Specialist <sup>§§</sup> | None listed                          |
| NIHB <sup>a</sup>       | ≥ F2                        | None listed                | None listed                   | Specialist <sup>§§</sup> | None listed                          |
| CSC <sup>b</sup>        | ≥ F2 <sup>¶¶</sup>          | None listed <sup>††</sup>  | None listed                   | None listed              | None listed                          |

<sup>a</sup>Federally-funded public drug benefit program for First Nations people and Inuit

<sup>b</sup>Federally-funded public drug benefit program for federal prisoners

<sup>¶</sup> Minimum fibrosis stage required

<sup>¶¶</sup> Treatment is prioritized to F3 and F4. Treatment for patients <F3 are reviewed on a case by case basis

<sup>†</sup> Drug and alcohol criteria restrictions: yes; no; none listed

<sup>††</sup> Direct Observed Therapy (DOT) required

<sup>‡</sup> Treatment for HIV co-infection: eligible; ineligible; none listed

<sup>¶¶</sup> However, exceptions could be granted via the "patient d'exception" route

<sup>§</sup> Prescriber limitation: specialist (hepatologist, gastroenterologist, infectious disease specialist) or physician (experienced with treating chronic Hepatitis C)

<sup>§§</sup> Prescriber restrictions not listed; however, specialist is listed as requirement for PEG-IFN-based therapies

<sup>‡</sup> Defined as higher Child Pugh score >6. Treatment eligibility for decompensated cirrhosis was also noted (categories: eligible; ineligible; may be considered)

**Table 3.** Key eligibility criteria for sofosbuvir with pegylated interferon and/or ribavirin reimbursement by province/territory in Canada

| Province/Territory      | Restrictions                |                             |                               |                         | Decompensated cirrhosis†        |
|-------------------------|-----------------------------|-----------------------------|-------------------------------|-------------------------|---------------------------------|
|                         | Fibrosis stage <sup>¶</sup> | Substance use <sup>†</sup>  | HIV co-infection <sup>1</sup> | Prescriber <sup>§</sup> |                                 |
| British Columbia        | ≥ F2                        | None listed <sup>††</sup>   | Eligible                      | General Practitioner    | May be considered               |
| Alberta                 | ≥ F2                        | None listed                 | Eligible                      | General Practitioner    | May be considered               |
| Saskatchewan            | ≥ F2                        | None listed <sup>†††</sup>  | Eligible                      | General Practitioner    | May be considered               |
| Manitoba                | ≥ F2                        | None listed                 | Eligible                      | Specialist              | May be considered               |
| Ontario                 | ≥ F2                        | None listed                 | Eligible                      | General Practitioner    | May be considered               |
| Quebec                  | None listed <sup>¶¶</sup>   | None listed                 | Ineligible <sup>¶¶</sup>      | None listed             | None listed                     |
| New Brunswick           | ≥ F2                        | None listed                 | Eligible                      | General Practitioner    | None listed                     |
| Newfoundland & Labrador | ≥ F2                        | None listed                 | Eligible                      | General Practitioner    | May be considered <sup>††</sup> |
| Prince Edward Island    | n.a.                        | n.a.                        | n.a.                          | n.a.                    | n.a.                            |
| Nova Scotia             | ≥ F2                        | None listed                 | Eligible                      | Specialist              | May be considered               |
| Yukon                   | ≥ F2                        | None listed                 | Eligible                      | Specialist              | May be considered               |
| Northwest Territories   | ≥ F2                        | None listed                 | None listed                   | General Practitioner    | None listed                     |
| Nunavut                 | ≥ F2                        | None listed                 | None listed                   | General Practitioner    | None listed                     |
| NIHB <sup>a</sup>       | ≥ F2                        | None listed                 | None listed                   | General Practitioner    | None listed                     |
| CSC <sup>b</sup>        | ≥ F2 <sup>¶¶¶</sup>         | None listed <sup>††††</sup> | None listed                   | None listed             | None listed                     |

<sup>a</sup>Federally-funded public drug benefit program for First Nations people and Inuit

<sup>b</sup>Federally-funded public drug benefit program for federal prisoners

<sup>¶</sup>Minimum fibrosis stage required

<sup>¶¶</sup>None listed in Criteria; but in practice, there are no fibrosis stage restrictions (Klein MB and Bruneau J, Personal Communication, Oct. 2015)

<sup>¶¶¶</sup>Treatment is prioritized to F3 and F4. Treatment for patients <F3 are reviewed on a case by case basis

<sup>†</sup>Drug and alcohol criteria restrictions: yes; no; none listed

<sup>††</sup>No specific criteria, but exclusion criteria states: "Patients who are at high risk for non-compliance"

<sup>†††</sup>None listed; however the prescriber can indicate that Direct Observed Therapy (DOT) is recommended; also the patient consents (via signature) to understanding treatment adherence

<sup>††††</sup>DOT required

<sup>1</sup>Treatment for HIV co-infection: eligible; ineligible; none listed

<sup>¶¶¶</sup>However, exceptions could be granted via the "patient d'exception" route

<sup>§</sup>Prescriber limitation: specialist (hepatologist, gastroenterologist, infectious disease specialist) or physician (experienced with treating chronic Hepatitis C)

<sup>†</sup>Defined as higher Child Pugh score >6. Treatment eligibility for decompensated cirrhosis was also noted (categories: eligible; ineligible; may be considered)

<sup>††</sup>Personal communication from L Barrett (Sept. 2015)

**Table 4.** Key eligibility criteria for ledipasvir-sofosbuvir reimbursement by province/territory in Canada

| Province/Territory      | Restrictions                |                             |                               |                         |                                      |
|-------------------------|-----------------------------|-----------------------------|-------------------------------|-------------------------|--------------------------------------|
|                         | Fibrosis stage <sup>¶</sup> | Substance use <sup>†</sup>  | HIV co-infection <sup>‡</sup> | Prescriber <sup>§</sup> | Decompensated cirrhosis <sup>‡</sup> |
| British Columbia        | ≥ F2                        | None listed <sup>††</sup>   | Eligible                      | General Practitioner    | May be considered                    |
| Alberta                 | ≥ F2                        | None listed                 | Eligible                      | General Practitioner    | May be considered                    |
| Saskatchewan            | ≥ F2                        | None listed <sup>†††</sup>  | Eligible                      | General Practitioner    | May be considered                    |
| Manitoba                | ≥ F2                        | None listed                 | Eligible                      | Specialist              | May be considered                    |
| Ontario                 | ≥ F2                        | None listed                 | Eligible                      | General Practitioner    | May be considered                    |
| Quebec                  | ≥ F3 <sup>¶¶</sup>          | None listed                 | Eligible <sup>¶¶</sup>        | General Practitioner    | Eligible                             |
| New Brunswick           | ≥ F2                        | None listed                 | Eligible                      | General Practitioner    | None listed                          |
| Newfoundland & Labrador | ≥ F2                        | None listed                 | Eligible                      | General Practitioner    | May be considered <sup>††</sup>      |
| Prince Edward Island    | n.a.                        | n.a.                        | n.a.                          | n.a.                    | n.a.                                 |
| Nova Scotia             | ≥ F2                        | None listed                 | Eligible                      | Specialist              | May be considered                    |
| Yukon                   | ≥ F2                        | None listed                 | Eligible                      | Specialist              | May be considered                    |
| Northwest Territories   | ≥ F2                        | None listed                 | Eligible                      | General Practitioner    | None listed                          |
| Nunavut                 | ≥ F2                        | None listed                 | Eligible                      | General Practitioner    | None listed                          |
| NIHB <sup>a</sup>       | ≥ F2                        | None listed                 | Eligible                      | General Practitioner    | None listed                          |
| CSC <sup>b</sup>        | ≥ F2 <sup>¶¶¶</sup>         | None listed <sup>††††</sup> | Eligible                      | None listed             | None listed                          |

<sup>a</sup>Federally-funded public drug benefit program for First Nations people and Inuit

<sup>b</sup>Federally-funded public drug benefit program for federal prisoners

<sup>¶</sup>Minimum fibrosis stage required

<sup>¶¶</sup>In year 1 (July 2015), only those with ≥F3 receive reimbursement

<sup>¶¶¶</sup>Treatment is prioritized to F3 and F4. Treatment for patients <F3 are reviewed on a case by case basis

<sup>†</sup>Drug and alcohol criteria restrictions: yes; none listed

<sup>††</sup>No specific criteria, but exclusion criteria states: "Patients who are at high risk for non-compliance"

<sup>†††</sup>None listed; prescriber can indicate that Direct Observed Therapy (DOT) is recommended; also the patient consents (via signature) to understanding treatment adherence

<sup>††††</sup>DOT required

<sup>‡</sup>Treatment for HIV co-infection: eligible; ineligible; or may be considered

<sup>‡‡</sup>Treated in year 1 (July 2015) if ≥F3

<sup>§</sup>Prescriber limitation: specialist (hepatologist, gastroenterologist, infectious disease specialist) or physician (experienced with treating chronic Hepatitis C)

<sup>‡</sup>Defined as higher Child Pugh score >6. Treatment eligibility for decompensated cirrhosis was also noted (categories: eligible; ineligible; may be considered)

<sup>††</sup>Personal communication from L Barrett (Sept. 2015)

1  
2  
3  
4  
5  
6  
7  
8  
9  
10  
11  
12  
13  
14  
15  
16  
17  
18  
19  
20  
21  
22  
23  
24  
25  
26  
27  
28  
29  
30  
31  
32  
33  
34  
35  
36  
37  
38  
39  
40  
41  
42  
43  
44  
45  
46  
47  
48  
49

**Table 5.** Key eligibility criteria for paritaprevir-ritonavir-ombitasvir plus dasabuvir (with or without ribavirin) reimbursement by province/territory in Canada

| Province/Territory      | Restrictions                |                              |                               |                         |                                      |
|-------------------------|-----------------------------|------------------------------|-------------------------------|-------------------------|--------------------------------------|
|                         | Fibrosis stage <sup>¶</sup> | Substance use <sup>†</sup>   | HIV co-infection <sup>‡</sup> | Prescriber <sup>§</sup> | Decompensated cirrhosis <sup>‡</sup> |
| British Columbia        | ≥ F2                        | None listed <sup>††</sup>    | Eligible                      | General Practitioner    | None listed                          |
| Alberta                 | ≥ F2                        | None listed                  | Eligible                      | General Practitioner    | Ineligible                           |
| Saskatchewan            | ≥ F2                        | None listed <sup>†††</sup>   | Eligible                      | General Practitioner    | Ineligible                           |
| Manitoba                | ≥ F2                        | None listed                  | Eligible                      | Specialist              | Ineligible                           |
| Ontario                 | ≥ F2                        | None listed                  | Eligible                      | General Practitioner    | Ineligible                           |
| Quebec                  | ≥ F3 <sup>¶¶¶</sup>         | None listed                  | Eligible <sup>¶¶</sup>        | General Practitioner    | Ineligible                           |
| New Brunswick           | ≥ F2                        | None listed                  | Eligible                      | General Practitioner    | Ineligible                           |
| Newfoundland & Labrador | ≥ F2                        | None listed                  | Eligible                      | General Practitioner    | Ineligible                           |
| Prince Edward Island    | No restrictions             | None listed <sup>††††</sup>  | Eligible <sup>¶¶¶</sup>       | General Practitioner    | None listed                          |
| Nova Scotia             | ≥ F2                        | None listed                  | Eligible                      | Specialist              | Ineligible                           |
| Yukon                   | ≥ F2                        | None listed                  | Eligible                      | Specialist              | Ineligible                           |
| Northwest Territories   | n.a.                        | n.a.                         | n.a.                          | n.a.                    | n.a.                                 |
| Nunavut                 | n.a.                        | n.a.                         | n.a.                          | n.a.                    | n.a.                                 |
| NIHB <sup>a</sup>       | n.a.                        | n.a.                         | n.a.                          | n.a.                    | n.a.                                 |
| CSC <sup>b</sup>        | ≥ F2 <sup>¶¶¶¶</sup>        | None listed <sup>†††††</sup> | None listed                   | None listed             | None listed                          |

<sup>a</sup>Federally-funded public drug benefit program for First Nations people and Inuit

<sup>b</sup>Federally-funded public drug benefit program for federal prisoners

<sup>¶</sup>Minimum fibrosis stage required

<sup>¶¶</sup>In year 1 (July 2015), only those with ≥F3 receive reimbursement

<sup>¶¶¶</sup>Treatment is prioritized to F3 and F4. Treatment for patients <F3 are reviewed on a case by case basis

<sup>†</sup>Drug and alcohol criteria restrictions: yes; no; none listed

<sup>††</sup>No specific criteria, but exclusion criteria states: “Patients who are at high risk for non-compliance”

<sup>†††</sup>None listed; prescriber can indicate that Direct Observed Therapy is recommended; also the patient consents (via signature) to understanding treatment adherence

<sup>††††</sup>There were restrictions left to physician discretion (e.g. methadone or equivalent for at least 6 months)

<sup>†††††</sup>DOT required

<sup>‡</sup>Treatment for HIV co-infection: eligible; ineligible; none listed

<sup>¶¶¶</sup>Treated in year 1 if ≥F3

<sup>¶¶¶¶</sup>Must be treated by a specialist off-island if HIV co-infected

<sup>§</sup>Prescriber limitation: specialist (hepatologist, gastroenterologist, infectious disease specialist) or physician (experienced with treating chronic Hepatitis C)

<sup>‡</sup>Defined as higher Child Pugh score >6. Treatment eligibility for decompensated cirrhosis was also noted (categories: eligible; ineligible; may be considered)



Confidential

1  
2  
3  
4  
5  
6  
7  
8  
9  
10  
11  
12  
13  
14  
15  
16  
17  
18  
19  
20  
21  
22  
23  
24  
25  
26  
27  
28  
29  
30  
31  
32  
33  
34  
35  
36  
37  
38  
39  
40  
41  
42  
43  
44  
45  
46  
47  
48  
49

1  
2  
3  
4  
5  
6  
7  
8  
9  
10  
11  
12  
13  
14  
15  
16  
17  
18  
19  
20  
21  
22  
23  
24  
25  
26  
27  
28  
29  
30  
31  
32  
33  
34  
35  
36  
37  
38  
39  
40  
41  
42  
43  
44  
45  
46  
47  
48  
49  
50  
51  
52  
53  
54  
55  
56  
57  
58  
59  
60

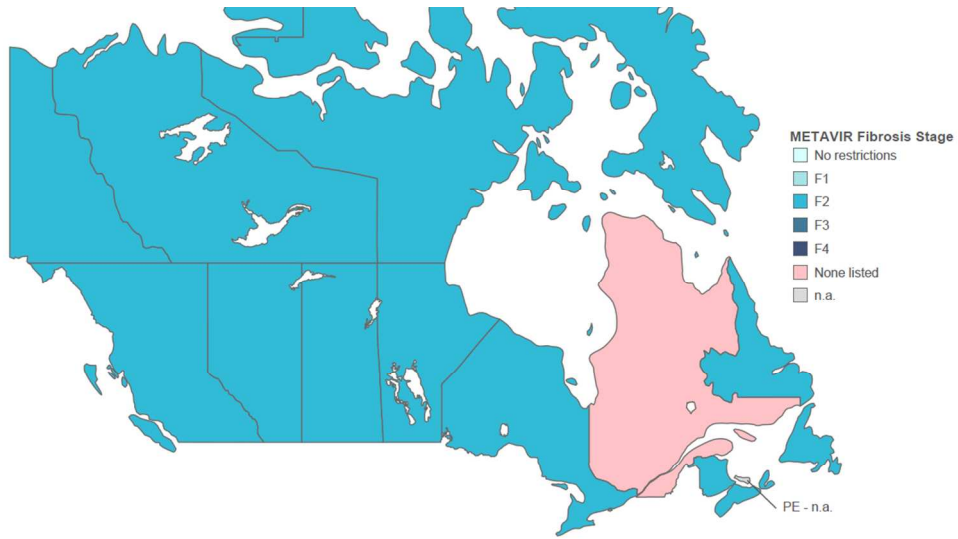

Figure 1A. Minimum fibrosis stage required for simeprevir with peginterferon plus ribavirin by province/territory in Canada.

Confidential

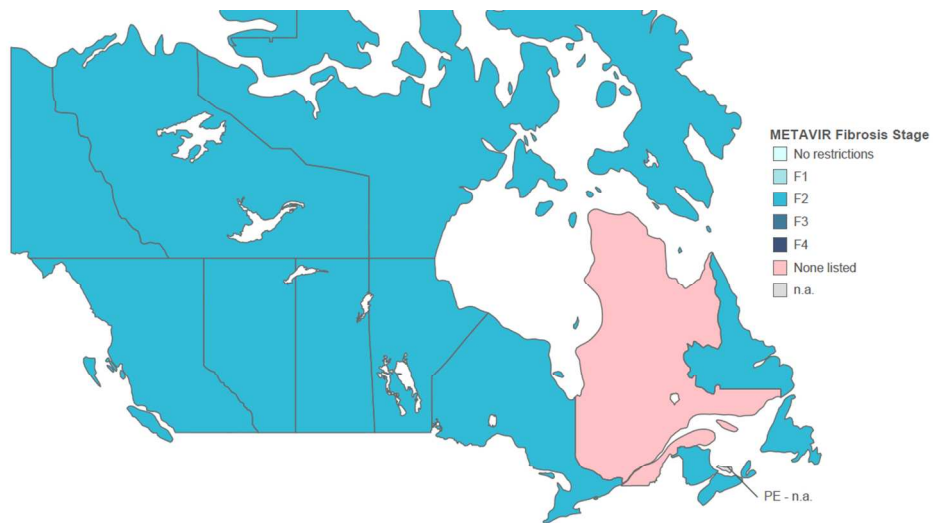

Figure 1B. Minimum fibrosis stage required for sofosbuvir with peginterferon and/or ribavirin by province/territory in Canada.

1  
2  
3  
4  
5  
6  
7  
8  
9  
10  
11  
12  
13  
14  
15  
16  
17  
18  
19  
20  
21  
22  
23  
24  
25  
26  
27  
28  
29  
30  
31  
32  
33  
34  
35  
36  
37  
38  
39  
40  
41  
42  
43  
44  
45  
46  
47  
48  
49  
50  
51  
52  
53  
54  
55  
56  
57  
58  
59  
60

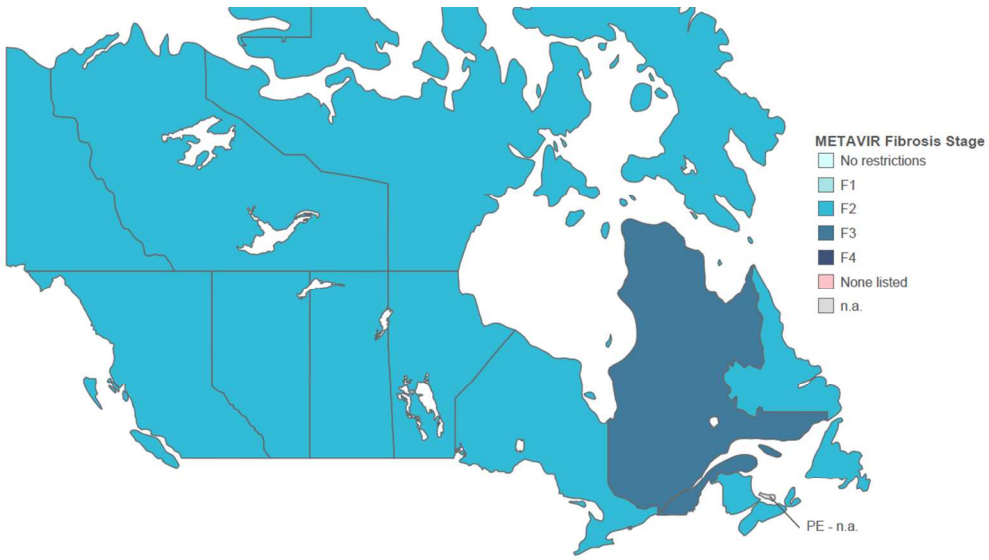

Figure 1C. Minimum fibrosis stage required for ledipasvir-sofosbuvir by province/territory in Canada.

Confidential

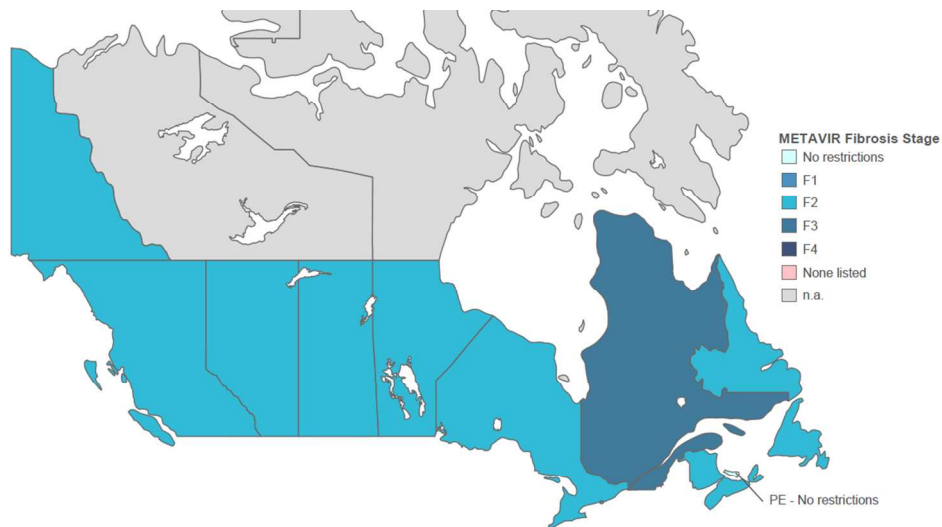

Figure 1D. Minimum fibrosis stage required for paritaprevir-ritonavir-ombitasvir plus dasabuvir with or without ribavirin by province/territory in Canada.
